# Supplementary material for: Self-assembly and elasticity of hierarchical proteoglycan–hyaluronan brushes
Source: Royal Society of Chemistry journal article supplement (doi:10.1039/c3sm51213d), 2013-01-01
Supplement: c3sm51213d.pdf [file c3sm51213d.pdf]

## Electronic Supplementary Information

# Self-assembly and elasticity of hierarchical proteoglycan-hyaluronan brushes

Seetharamaiah Attili,<sup>a,b,d</sup> and Ralf P. Richter<sup>\*a,b,c</sup>

<sup>a</sup> Biosurfaces Unit, CIC biomaGUNE, Paseo Miramon 182, 20009 San Sebastian, Spain

<sup>b</sup> Max Planck Institute for Intelligent Systems, Heisenbergstraße 3, 70569 Stuttgart, Germany

<sup>c</sup> I2BM, Department of Molecular Chemistry, J. Fourier University, 570 Rue de la Chimie, 38041 Grenoble Cedex 9, France

<sup>d</sup> Present address: Randall Division for Cell and Molecular Biophysics, New Hunt's House, Guy's Campus, King's College London, SE1 1UL, UK.

\*Corresponding author. Email: [richter@cicbiomagune.es](mailto:richter@cicbiomagune.es), phone: +34 943 0053 29, fax: +34 943 0053 15.

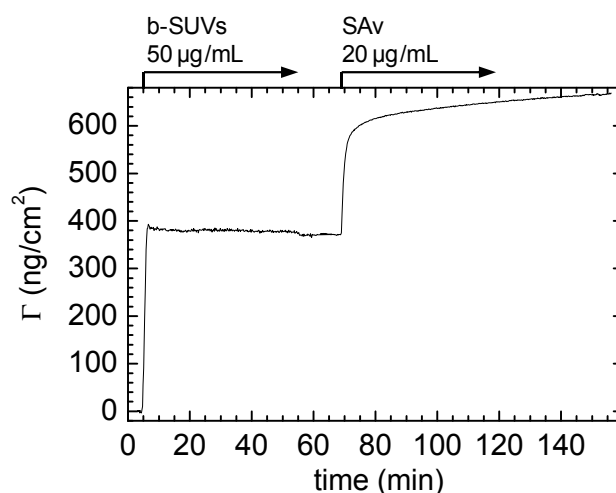

**Figure S1. Areal mass density  $\Gamma$  during the adsorption of small unilamellar vesicles containing biotinylated lipids (b-SUVs) and streptavidin (SAV), as measured by SE.** The start and duration of incubations with samples are indicated by arrows on top of the panels; during remaining times, the silica surface was exposed to pure buffer solution. Areal lipid and protein densities are consistent with a supported lipid bilayer and a dense SAV monolayer, respectively. Close inspection of the binding curve after SAV binding revealed a small but steady increase in  $\Gamma$  even after rinsing ( $\sim 0.36 \text{ ng/cm}^2/\text{min}$ ), the origin of which remains unclear.
